# Supplementary material for: The fabrication and characterization of a supramolecular Cu-based metallogel thin-film based Schottky diode
Source: Royal Society of Chemistry journal article supplement (doi:10.1039/d1nj00394a), 2021-01-01
Supplement: d1nj00394a1.pdf [file d1nj00394a1.pdf]

# Supporting Information

**Fabrication and characterization of supramolecular Cu-based metallogel thin film based**

**Schottky diode**

Vivek Kumar<sup>a</sup>, Rishibrind Kumar Upadhyay<sup>b</sup>, Daraksha Bano<sup>a</sup>, Subhash Chandra<sup>a</sup>, Deepak Kumar<sup>a</sup>, Satyabrata Jit<sup>b</sup>, Syed Hadi Hasan<sup>a\*</sup>

<sup>a</sup> Department of Chemistry, Nano-materials Laboratory, IIT BHU, Varanasi-221005

<sup>b</sup> Department of Electronics Engineering, IIT BHU, Varanasi-221005

**\*Corresponding author's details;**

**E-mail:** [shhasan.apc@itbhu.ac.in](mailto:shhasan.apc@itbhu.ac.in)

**Mobile Number:** +91 9839089919

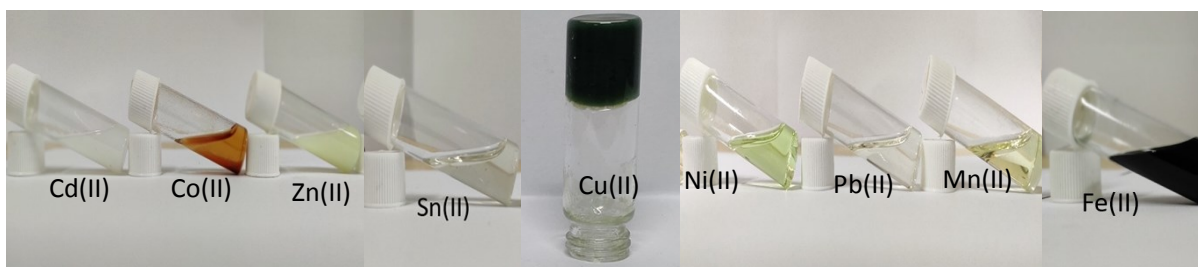

**Figure S1** Gelation ability test of metal cations with gelator H<sub>4</sub>L in DMF:

The gelation ability of various metal cations with gelator H<sub>4</sub>L was tested in DMF, and maintaining the minimum critical gel concentration of Cu-H<sub>4</sub>L metallo gel from the synthetic method of metallo gel, described in the experimental section. The gel formation strategy of Cu-H<sub>4</sub>L metallo gel in different solvents were also checked by 'inversion of the vial' test. It was clearly revealed that the Cu(OAc)<sub>2</sub>·H<sub>2</sub>O and gelator H<sub>4</sub>L based mechanically stable Cu-H<sub>4</sub>L metallo gel can exclusively form in DMF (Figure S1).

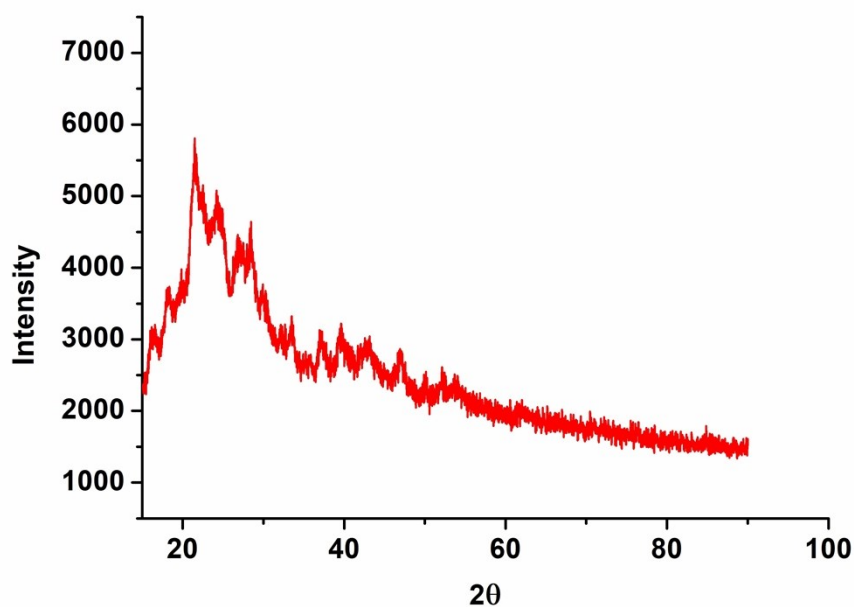

**Figure S2** Powder X-ray diffraction pattern of xerogel indicating amorphous upon complexation

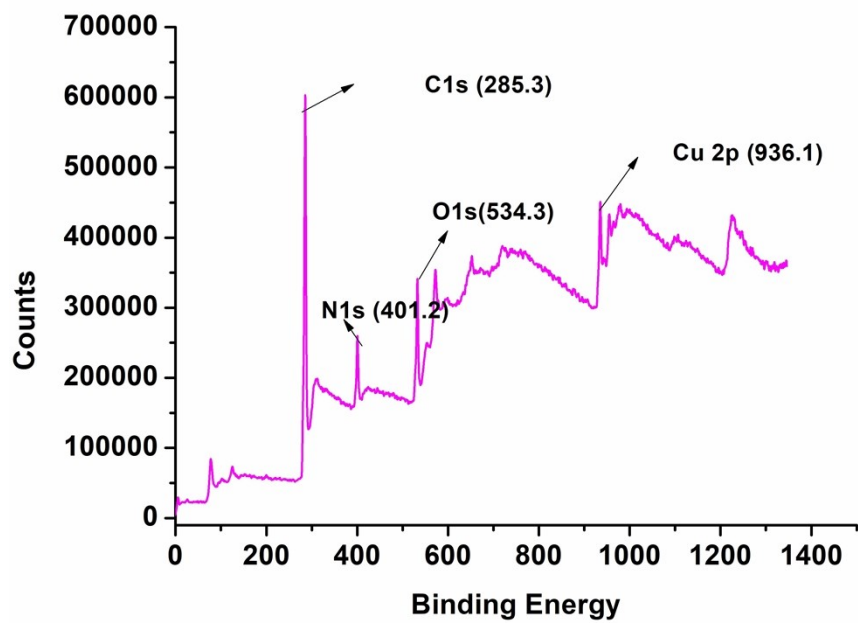

**Figure S3** XPS full survey spectra of C 1s, N 1s, O 1s, and Cu 2p.
